# Supplementary material for: Silica template-assisted synthesis of SnO2@porous carbon composites as anode materials with excellent rate capability and cycling stability for lithium-ion batteries
Source: Royal Society of Chemistry journal article supplement (doi:10.1039/c7ra03594b), 2017-01-01
Supplement: c7ra03594b1.pdf [file c7ra03594b1.pdf]

**Electronic Supplementary Materials**

Silica Template-Assistant Synthesis of SnO<sub>2</sub>@Porous Carbon  
Composites as Anode Materials with Excellent Rate Capability and  
Cycling Stability for Lithium-Ion Batteries

Jian Guo, Ping Li, Liying Chai, Yi Su, Jinxiang Diao, Xiaohui Guo\*

\* Prof. Dr. Xiaohui Guo, Dr. Jian Guo, Ping Li, Liying Chai, Yi Su, Jinxiang Diao,  
Key Lab of Synthetic and Natural Functional Molecule Chemistry of Ministry of  
Education, and the College of Chemistry and Materials Science, College of Chemistry  
and Materials Science, Northwest University, Xi'an 710069, China

\*Corresponding E-mail addresses: [guoxh2009@nwu.edu.cn](mailto:guoxh2009@nwu.edu.cn)

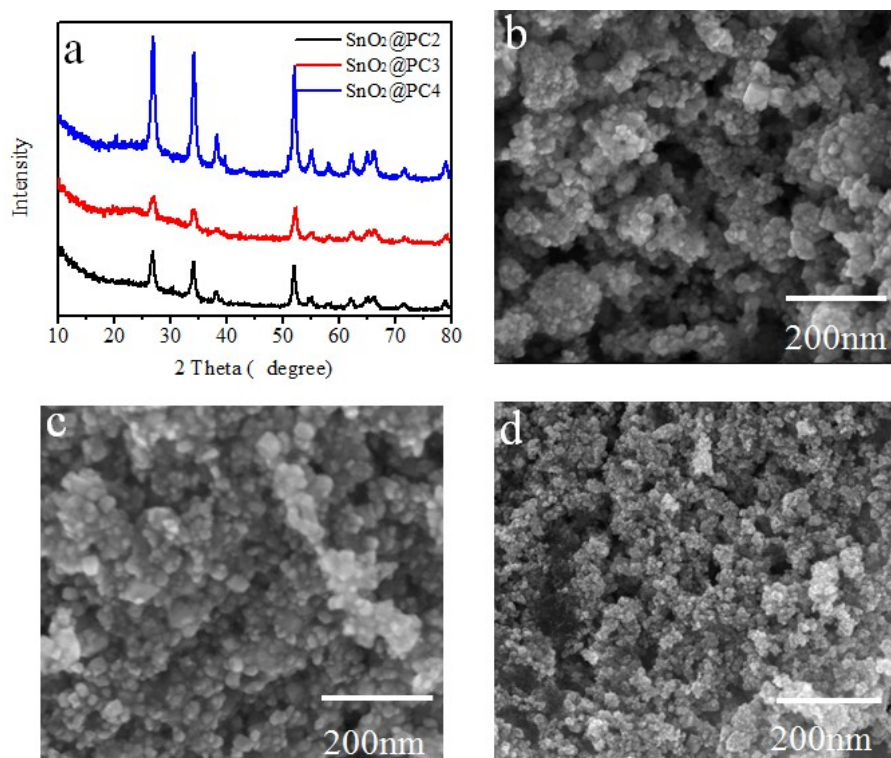

**Figure.S1.** (a) XRD patterns; (b) FE-SEM image of SnO<sub>2</sub>@PC2, SnO<sub>2</sub>@PC3, and SnO<sub>2</sub>@PC4 samples.

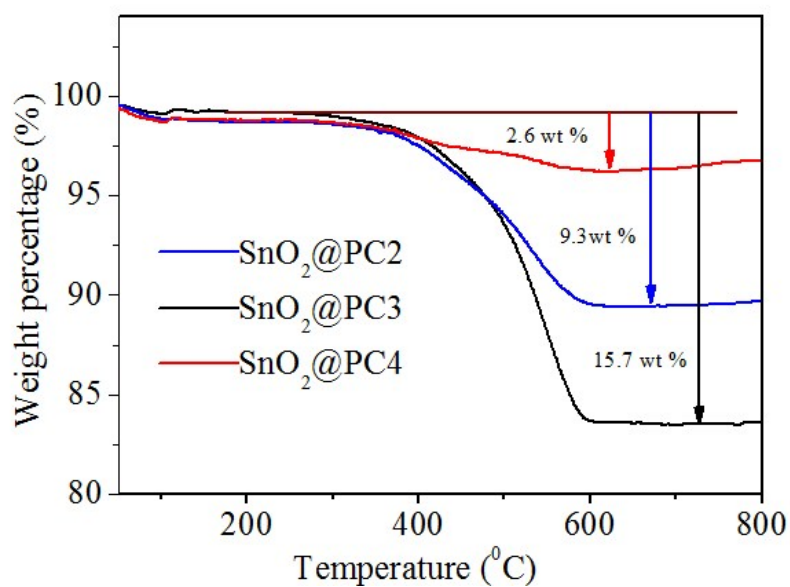

**Figure S2:** TGA curves for the prepared three SnO<sub>2</sub>@PC2, SnO<sub>2</sub>@PC3, and SnO<sub>2</sub>@PC4 samples.

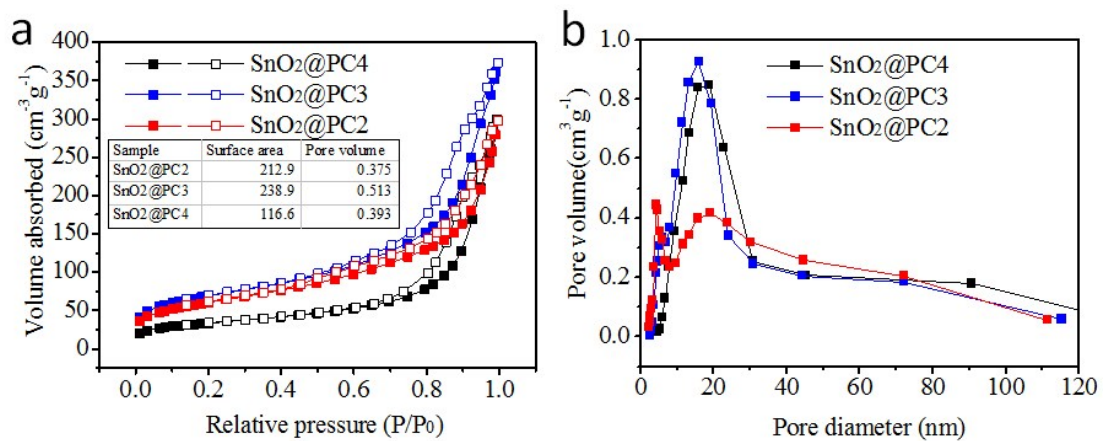

**Figure.S3.** Isothermal Nitrogen adsorption–desorption isotherms (a); pore-size-distribution curves of SnO<sub>2</sub>@PC2, SnO<sub>2</sub>@PC3, and SnO<sub>2</sub>@PC4 samples (b).

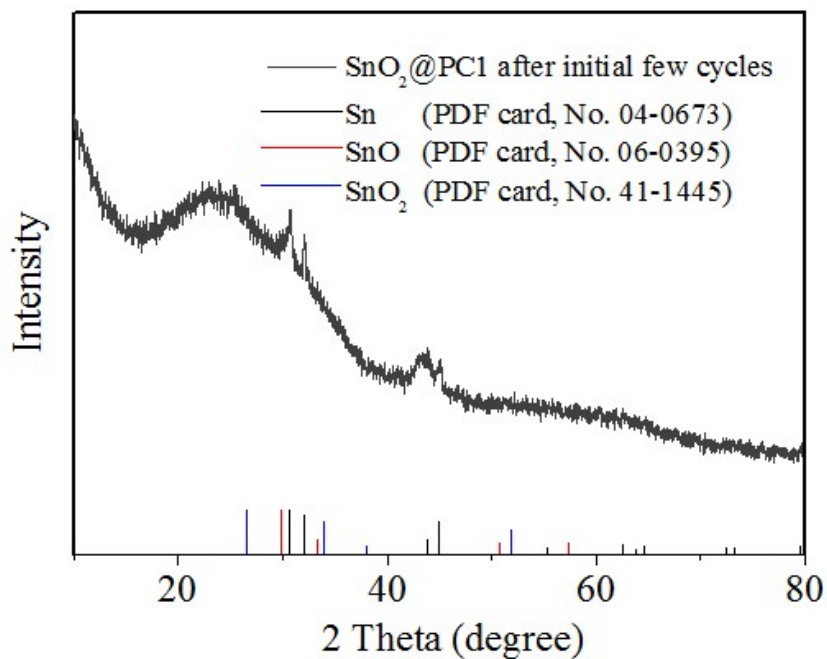

**Figure S4:** XRD pattern of the SnO<sub>2</sub>@PC1 anode after initial few cycles

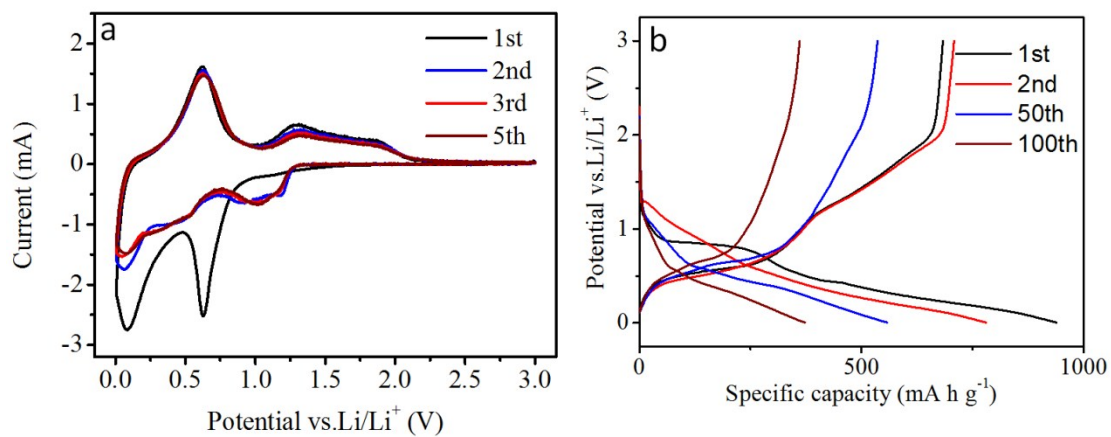

**Figure.S5.** Electrochemical performances evaluation of bare SnO<sub>2</sub> anode, (a) CV curves; (b) Charge-discharge curves of SnO<sub>2</sub> anode at current density of 0.2 A g<sup>-1</sup>.

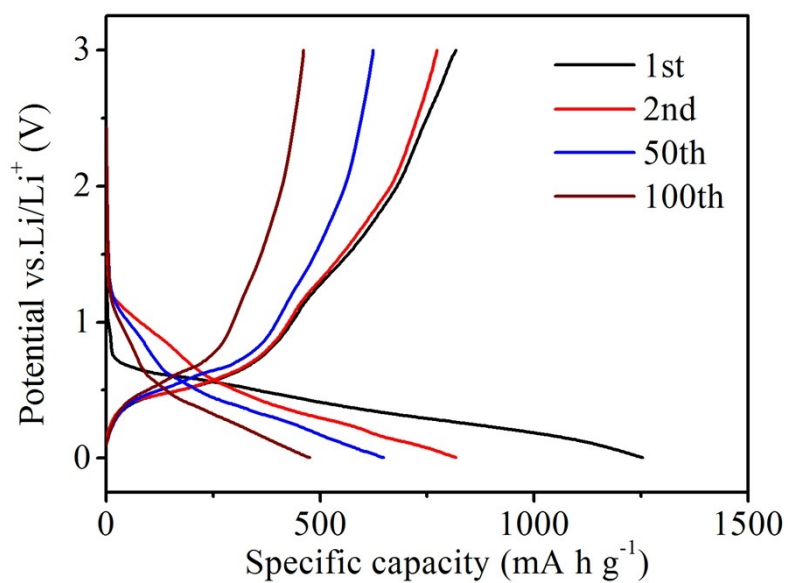

**Figure.S6.** Charge-discharge curves of SnO<sub>2</sub>@C anode in LIBs at current density of 0.2 A g<sup>-1</sup>.

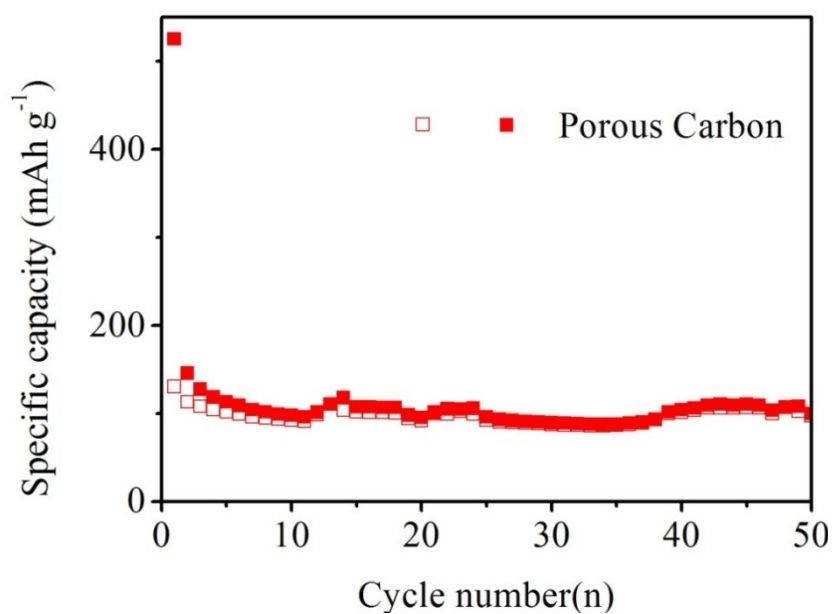

**Figure.S7:** Cycling performance curves of the pure carbon anode at a current density of 0.2 A<sup>-1</sup> g in LIBs.

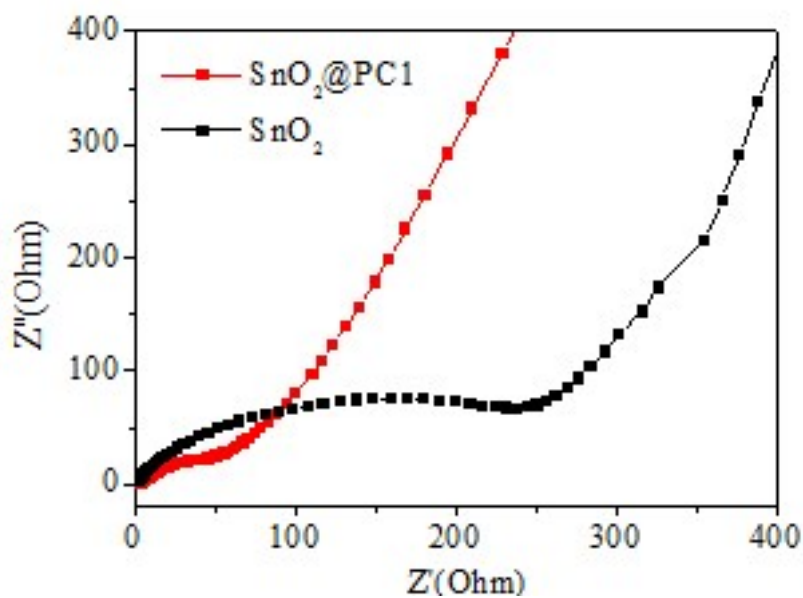

**Figure.S8.** EIS plots of the SnO<sub>2</sub>@PC1 and SnO<sub>2</sub> anodes.

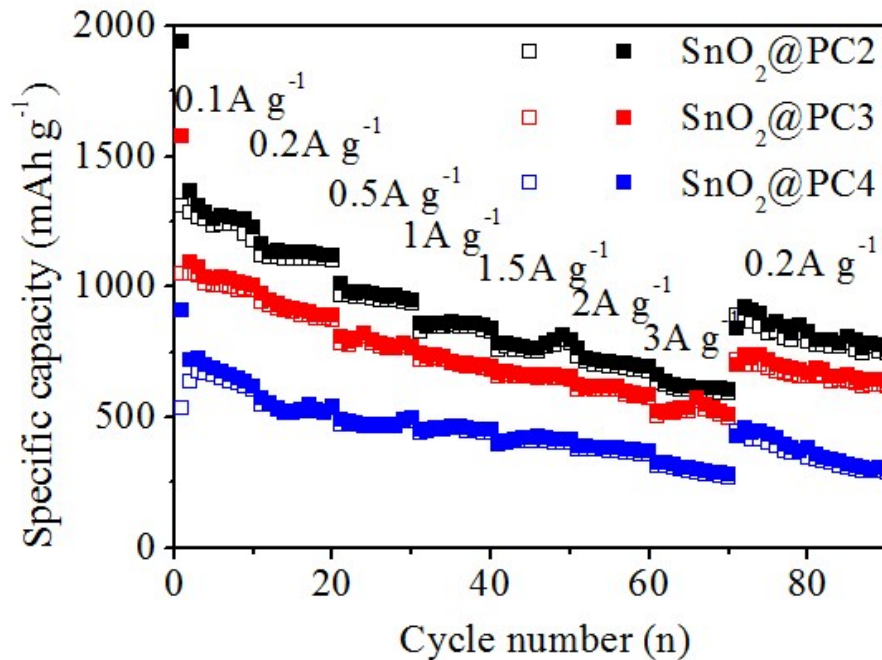

**Figure.S9.** Rate performance curves of the SnO<sub>2</sub>@PC2, SnO<sub>2</sub>@PC3, and SnO<sub>2</sub>@PC4 anodes at different current densities in LIBs.

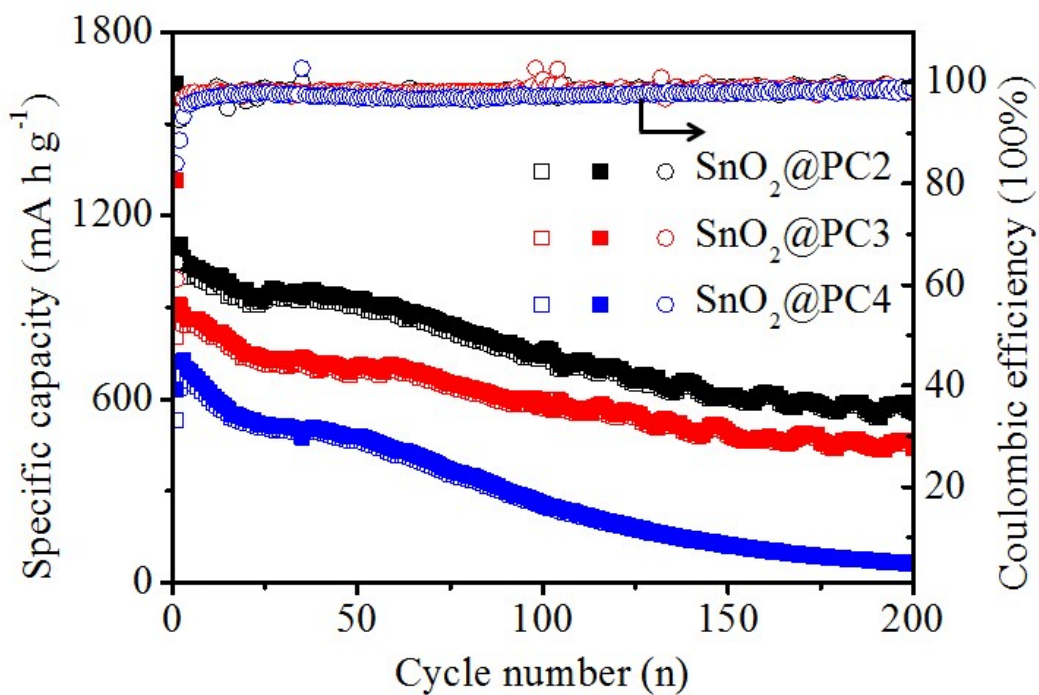

**Figure.S10:** Cycling performance testing curves of the SnO<sub>2</sub>@PC2, SnO<sub>2</sub>@PC3, and SnO<sub>2</sub>@PC4 anodes in LIBs at a current density of 0.5 A<sup>-1</sup> g.

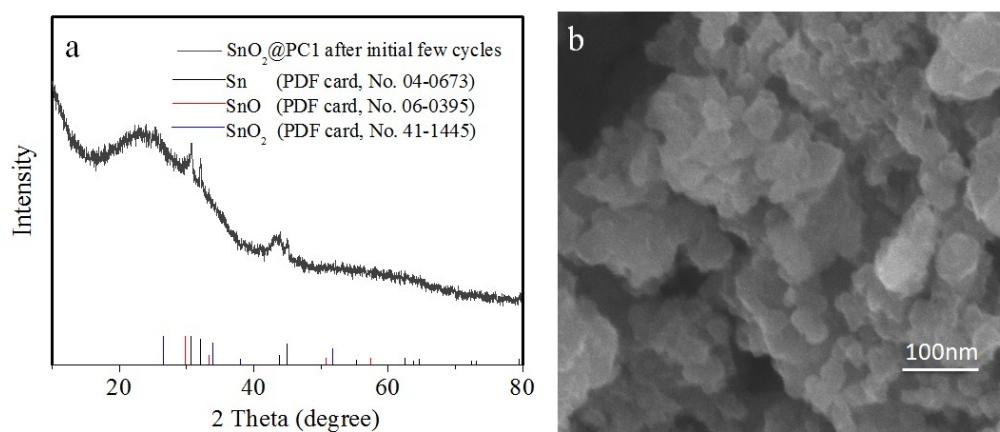

**Figure S11.** XRD and SEM image of SnO<sub>2</sub>@PC1 at 0.2 A<sup>-1</sup> g after 100 cycles.
